# Supplementary material for: Use of a microfluidic platform to uncover basic features of energy and environmental stress responses in individual cells of Bacillus subtilis
Source: PubMed Central journal article supplement (PMC5542698; doi:10.1371/journal.pgen.1006901), 2017-07-20
Supplement: pgen.1006901.s001.pdf [file pgen.1006901.s001.pdf]

## Detailed Modes of Strain and Plasmid Construction

The markerless deletions in the strains below were added in succession using the pminiMAD vector (gift of Daniel Kearns). For each deletion step, a pminiMAD vector containing the desired deletion was directly transformed into PY79 via competence {Wilson, 1968 #1148} and selected on MLS (0.5 µg/ml erythromycin and 2.5 µg/ml lincomycin). A phage SPP1 lysate was prepared from that intermediate strain, and the recipient strain was phage-transduced with the PY79 strain containing the desired chromosomally integrated miniMAD vector and again selected on MLS. Five to 10 transductants were then inoculated into liquid LB and kept in exponential phase at approximately 25°C for several hours to permit plasmid excision before being repeatedly diluted and grown in liquid LB at 37°C (restrictive for plasmid replication) to promote loss of excised plasmid. The cells were then plated, and single colonies were screened for the deletion by colony PCR, restreaked for single colonies, patched on plain LB and LB/MLS plates to verify plasmid loss, restreaked, verified by PCR and stored at -80°C.

### MTC1761

Wild-type NCIB3610 (RL2912) was deleted for *ytvA* to produce MTC1672 (3610  $\Delta$ *ytvA*). MTC1672 was deleted for *rsbRC* to produce MTC1685 (3610  $\Delta$ *ytvA*  $\Delta$ *rsbRC*). MTC1685 was deleted for *rsbRD* to produce MTC1689 (3610  $\Delta$ *ytvA*  $\Delta$ *rsbRC*  $\Delta$ *rsbRD*). MTC1689 was deleted for *rsbRB* to produce MTC1697 (3610  $\Delta$ *ytvA*  $\Delta$ *rsbRB*  $\Delta$ *rsbRC*  $\Delta$ *rsbRD*). MTC1697 was phage-transduced with a lysate from TMN688 (3610 *hag*<sub>A233V</sub> *phleo*<sup>R</sup>) and selected on 20 µg/ml zeocin to produce MTC1707 (3610  $\Delta$ *ytvA*  $\Delta$ *rsbRB*  $\Delta$ *rsbRC*  $\Delta$ *rsbRD* *hag*<sub>A233V</sub>). MTC1707 was transduced with a lysate from MTC1741 (PY79 *ywrK::DG1730-P<sub>rsbV</sub>-mNeonGreen*) and selected on spectinomycin (100 µg/ml) to produce MTC1749 (3610  $\Delta$ *ytvA*  $\Delta$ *rsbRB*  $\Delta$ *rsbRC*  $\Delta$ *rsbRD* *hag*<sub>A233V</sub> *ywrK::DG1730-P<sub>rsbV</sub>-mNeonGreen*). Finally, MTC1749 was transduced with a lysate from JRR227 (PY79 *amyE::DG364-P<sub>hyperspank</sub>-mNeptune*) and selected on chloramphenicol (5 µg/ml) to produce MTC1761.

### MTC1763

Constructed as MTC1761, except that MTC1689 was deleted for *rsbRA* to produce MTC1695 (3610  $\Delta$ *ytvA*  $\Delta$ *rsbRA*  $\Delta$ *rsbRC*  $\Delta$ *rsbRD*). MTC1695 was phage-transduced with *hag*<sub>A233V</sub> to produce MTC1705, which was transduced with lysate from MTC1741 to produce MTC1750, which was transduced with lysate from JRR227 to produce MTC1763.

### MTC1765

Constructed as MTC1761, except that MTC1672 was deleted for *rsbRA* to produce MTC1683 (3610  $\Delta$ *ytvA*  $\Delta$ *rsbRA*). MTC1683 was deleted for *rsbRB* to produce MTC1687 (3610  $\Delta$ *ytvA*  $\Delta$ *rsbRA*  $\Delta$ *rsbRB*). MTC1687 was deleted for *rsbRD* to produce MTC1693 (3610  $\Delta$ *ytvA*  $\Delta$ *rsbRA*  $\Delta$ *rsbRB*  $\Delta$ *rsbRD*). MTC1693 was phage-transduced with *hag*<sub>A233V</sub> to produce MTC1703, which

was transduced with lysate from MTC1741 to produce MTC1751, which was transduced with lysate from JRR227 to produce MTC1765.

### **MTC1767**

Constructed as MTC1765, except that MTC1687 (3610  $\Delta ytvA \Delta rsbRA \Delta rsbRB$ ) was deleted for *rsbRC* to produce MTC1691 (3610  $\Delta ytvA \Delta rsbRA \Delta rsbRB \Delta rsbRC$ ). MTC1691 was phage-transduced with *hag*<sub>A233V</sub> to produce MTC1701, which was transduced with lysate from MTC1741 to produce MTC1752, which was transduced with lysate from JRR227 to produce MTC1767.

### **MTC1801**

Constructed as MTC1761, except that MTC1672 (3610  $\Delta ytvA$ ) was phage-transduced with *hag*<sub>A233V</sub> to produce MTC1779, which was transduced with lysate from JRR227 to produce MTC1793, which was transduced with lysate from MTC1741 to produce MTC1801.

### **MTC1906**

Constructed as MTC1801, except that MTC1779 (3610  $\Delta ytvA \text{ hag}_{A233V}$ ) was deleted for *rsbP* to produce MTC1898 (3610  $\Delta ytvA \Delta rsbP \text{ hag}_{A233V}$ ), which was transduced with lysate from JRR227 to produce MTC1902, which was transduced with lysate from MTC1741 to produce MTC1906.

### **MTC1920**

Constructed as MTC1801, except that MTC1779 (3610  $\Delta ytvA \text{ hag}_{A233V}$ ) was deleted for *rsbU* to produce MTC1912 (3610  $\Delta ytvA \Delta rsbU \text{ hag}_{A233V}$ ), which was transduced with lysate from JRR227 to produce MTC1916, which was transduced with lysate from MTC1741 to produce MTC1920.

### **MTC1930**

Constructed as MTC1920, except that MTC1912 (3610  $\Delta ytvA \Delta rsbU \text{ hag}_{A233V}$ ) was deleted for *rsbP* to produce MTC1926 (3610  $\Delta ytvA \Delta rsbP \Delta rsbU \text{ hag}_{A233V}$ ), which was transduced with lysate from JRR227 to produce MTC1928, which was transduced with lysate from MTC1741 to produce MTC1930.

## **Plasmid construction methods**

### **pDG364-P<sub>hyperspank</sub>-mNeptune**

Plasmid pDG364 was linearized with HindIII. The *hyperspank* promoter was amplified from pDR111 (laboratory stock) with primers JRR162 and JRR163, and mNeptune was amplified

from template DNA provided by Ethan Garner with primers JRR164 and JRR165. The two amplicons were gel purified and isothermally assembled {Gibson, 2009 #989} together with the linearized pDG364. The resulting plasmid was propagated in *E. coli* and confirmed by sequencing.

### **pDG1730-P<sub>rsbV</sub>-mNeonGreen**

Plasmid pDG1730 was linearized with EcoRI and alkaline phosphatase-treated. The promoter region of *rsbV* was PCR-amplified from *B. subtilis* NCIB3610 genomic DNA with primers 727 and 728, and the mNeonGreen coding sequence was amplified from template DNA kindly provided by Ethan Garner using primers 729 and JRR189. These two amplicons were gel purified and PCR-stitched together via self priming and primers 727 and JRR189 before being gel-purified and isothermally assembled {Gibson, 2009 #989} into the linearized pDG1730. The resulting plasmid was propagated in *E. coli* and confirmed by sequencing.

### **pminiMAD-Δ*rsbRA***

Plasmid pminiMAD was linearized with EcoRI and HindIII. The 5' and 3' flanking regions (500-600 nt) of *rsbRA* were amplified with primers 689/690 and 691/692, respectively, gel purified, PCR-stitched together using primers 689/692, again gel-purified, and isothermally assembled {Gibson, 2009 #989} with the linearized pminiMAD. The resulting plasmid was propagated in *E. coli* and confirmed by sequencing.

### **pminiMAD-Δ*rsbRB***

Plasmid pminiMAD was linearized with EcoRI and HindIII. The 5' and 3' flanking regions (500-600 nt) of *rsbRB* were amplified with primers 693/694 and 695/696, respectively, gel purified, PCR-stitched together using primers 693/696, again gel-purified, and isothermally assembled {Gibson, 2009 #989} with the linearized pminiMAD. The resulting plasmid was propagated in *E. coli* and confirmed by sequencing.

### **pminiMAD-Δ*rsbRC***

Plasmid pminiMAD was linearized with EcoRI and HindIII. The 5' and 3' flanking regions (500-600 nt) of *rsbRC* were amplified with primers 697/698 and 699/700, respectively, gel purified, PCR-stitched together using primers 697/700, again gel-purified, and isothermally assembled {Gibson, 2009 #989} with the linearized pminiMAD. The resulting plasmid was propagated in *E. coli* and confirmed by sequencing.

### **pminiMAD-Δ*rsbRD***

Plasmid pminiMAD was linearized with EcoRI and HindIII. The 5' and 3' flanking regions (500-600 nt) of *rsbRD* were amplified with primers 701/702 and 703/704, respectively, gel purified,

PCR-stitched together using primers 701/704, again gel-purified, and isothermally assembled {Gibson, 2009 #989} with the linearized pminiMAD. The resulting plasmid was propagated in *E. coli* and confirmed by sequencing.

#### **pminiMAD- $\Delta$ rsbP**

Plasmid pminiMAD was linearized with EcoRI and HindIII. The 5' and 3' flanking regions (500-600 nt) of *rsbP* were amplified with primers 756/757 and 758/759, respectively, gel purified, PCR-stitched together using primers 757/759, again gel-purified, and isothermally assembled {Gibson, 2009 #989} with the linearized pminiMAD. The resulting plasmid was propagated in *E. coli* and confirmed by sequencing.

#### **pminiMAD- $\Delta$ rsbU**

Plasmid pminiMAD was linearized with EcoRI and HindIII. The 5' and 3' flanking regions (500-600 nt) of *rsbU* were amplified with primers 752/753 and 754/755, respectively, gel purified, PCR-stitched together using primers 753/755, again gel-purified, and isothermally assembled {Gibson, 2009 #989} with the linearized pminiMAD. The resulting plasmid was propagated in *E. coli* and confirmed by sequencing.

#### **pminiMAD- $\Delta$ ytvA**

Plasmid pminiMAD was linearized with EcoRI and HindIII. The 5' and 3' flanking regions (500-600 nt) of *ytvA* were amplified with primers 705/706 and 707/708, respectively, gel purified, PCR-stitched together using primers 705/708, again gel-purified, and isothermally assembled {Gibson, 2009 #989} with the linearized pminiMAD. The resulting plasmid was propagated in *E. coli* and confirmed by sequencing.

**Table S1. Intermediate strains, plasmids, and primers**

| <b>Strain or plasmid</b>          | <b>Relevant genotype or description</b>                                    | <b>Source or reference</b> |
|-----------------------------------|----------------------------------------------------------------------------|----------------------------|
| <b><i>B. subtilis</i> strains</b> |                                                                            |                            |
| JRR227                            | PY79 <i>amyE::DG364-P<sub>hyperspank</sub>-mNeptune</i> (Cm <sup>R</sup> ) | This study                 |
| MTC1672                           | 3610 $\Delta$ ytvA                                                         | This study                 |
| MTC1683                           | 3610 $\Delta$ ytvA $\Delta$ rsbRA                                          | This study                 |
| MTC1685                           | 3610 $\Delta$ ytvA $\Delta$ rsbRC                                          | This study                 |
| MTC1687                           | 3610 $\Delta$ ytvA $\Delta$ rsbRA $\Delta$ rsbRB                           | This study                 |

|         |                                                                                                                                                                                          |            |
|---------|------------------------------------------------------------------------------------------------------------------------------------------------------------------------------------------|------------|
| MTC1689 | 3610 $\Delta$ ytvA $\Delta$ rsbRC $\Delta$ rsbRD                                                                                                                                         | This study |
| MTC1691 | 3610 $\Delta$ ytvA $\Delta$ rsbRA $\Delta$ rsbRB $\Delta$ rsbRC                                                                                                                          | This study |
| MTC1693 | 3610 $\Delta$ ytvA $\Delta$ rsbRA $\Delta$ rsbRB $\Delta$ rsbRD                                                                                                                          | This study |
| MTC1695 | 3610 $\Delta$ ytvA $\Delta$ rsbRA $\Delta$ rsbRC $\Delta$ rsbRD                                                                                                                          | This study |
| MTC1697 | 3610 $\Delta$ ytvA $\Delta$ rsbRB $\Delta$ rsbRC $\Delta$ rsbRD                                                                                                                          | This study |
| MTC1701 | 3610 $\Delta$ ytvA $\Delta$ rsbRA $\Delta$ rsbRB $\Delta$ rsbRC <i>hag</i> <sub>A233V</sub> (Phleo <sup>R</sup> )                                                                        | This study |
| MTC1703 | 3610 $\Delta$ ytvA $\Delta$ rsbRA $\Delta$ rsbRB $\Delta$ rsbRD <i>hag</i> <sub>A233V</sub> (Phleo <sup>R</sup> )                                                                        | This study |
| MTC1705 | 3610 $\Delta$ ytvA $\Delta$ rsbRA $\Delta$ rsbRC $\Delta$ rsbRD <i>hag</i> <sub>A233V</sub> (Phleo <sup>R</sup> )                                                                        | This study |
| MTC1707 | 3610 $\Delta$ ytvA $\Delta$ rsbRB $\Delta$ rsbRC $\Delta$ rsbRD <i>hag</i> <sub>A233V</sub> (Phleo <sup>R</sup> )                                                                        | This study |
| MTC1741 | PY79 <i>ywrK::DG1730-P<sub>rsbV</sub>-mNeonGreen</i> (Spc <sup>R</sup> )                                                                                                                 | This study |
| MTC1749 | 3610 $\Delta$ ytvA $\Delta$ rsbRB $\Delta$ rsbRC $\Delta$ rsbRD <i>hag</i> <sub>A233V</sub> (Phleo <sup>R</sup> )<br><i>ywrK::DG1730-P<sub>rsbV</sub>-mNeonGreen</i> (Spc <sup>R</sup> ) | This study |
| MTC1750 | 3610 $\Delta$ ytvA $\Delta$ rsbRA $\Delta$ rsbRC $\Delta$ rsbRD <i>hag</i> <sub>A233V</sub> (Phleo <sup>R</sup> )<br><i>ywrK::DG1730-P<sub>rsbV</sub>-mNeonGreen</i> (Spc <sup>R</sup> ) | This study |
| MTC1751 | 3610 $\Delta$ ytvA $\Delta$ rsbRA $\Delta$ rsbRB $\Delta$ rsbRD <i>hag</i> <sub>A233V</sub> (Phleo <sup>R</sup> )<br><i>ywrK::DG1730-P<sub>rsbV</sub>-mNeonGreen</i> (Spc <sup>R</sup> ) | This study |
| MTC1752 | 3610 $\Delta$ ytvA $\Delta$ rsbRA $\Delta$ rsbRB $\Delta$ rsbRC <i>hag</i> <sub>A233V</sub> (Phleo <sup>R</sup> )<br><i>ywrK::DG1730-P<sub>rsbV</sub>-mNeonGreen</i> (Spc <sup>R</sup> ) | This study |
| MTC1779 | 3610 $\Delta$ ytvA <i>hag</i> <sub>A233V</sub> (Phleo <sup>R</sup> )                                                                                                                     | This study |
| MTC1793 | 3610 $\Delta$ ytvA <i>hag</i> <sub>A233V</sub> (Phleo <sup>R</sup> ) <i>amyE::DG364-P<sub>hyperspank</sub>-mNeptune</i> (Cm <sup>R</sup> )                                               | This study |
| MTC1898 | 3610 $\Delta$ ytvA $\Delta$ rsbP <i>hag</i> <sub>A233V</sub> (Phleo <sup>R</sup> )                                                                                                       | This study |
| MTC1902 | 3610 $\Delta$ ytvA $\Delta$ rsbP <i>hag</i> <sub>A233V</sub> (Phleo <sup>R</sup> ) <i>amyE::DG364-P<sub>hyperspank</sub>-mNeptune</i> (Cm <sup>R</sup> )                                 | This study |
| MTC1912 | 3610 $\Delta$ ytvA $\Delta$ rsbU <i>hag</i> <sub>A233V</sub> (Phleo <sup>R</sup> )                                                                                                       | This study |
| MTC1916 | 3610 $\Delta$ ytvA $\Delta$ rsbU <i>hag</i> <sub>A233V</sub> (Phleo <sup>R</sup> ) <i>amyE::DG364-P<sub>hyperspank</sub>-mNeptune</i> (Cm <sup>R</sup> )                                 | This study |

|                                          |                                                                                                                                                            |                       |
|------------------------------------------|------------------------------------------------------------------------------------------------------------------------------------------------------------|-----------------------|
| MTC1926                                  | 3610 $\Delta$ ytvA $\Delta$ rsbP $\Delta$ rsbU hag <sub>A233V</sub> (Phleo <sup>R</sup> )                                                                  | This study            |
| MTC1928                                  | 3610 $\Delta$ ytvA $\Delta$ rsbP $\Delta$ rsbU hag <sub>A233V</sub> (Phleo <sup>R</sup> ) amyE::DG364-P <sub>hyperspank</sub> -mNeptune (Cm <sup>R</sup> ) | This study            |
| RL2912                                   | <i>B. subtilis</i> 3610                                                                                                                                    | Laboratory stock      |
| TMN688                                   | 3610 hag <sub>A233V</sub> (Phleo <sup>R</sup> )                                                                                                            | {Norman, 2013 #1013}  |
|                                          |                                                                                                                                                            |                       |
| <b>Plasmids</b>                          |                                                                                                                                                            |                       |
| pDG364                                   | amyE integrating plasmid (Cm <sup>R</sup> )                                                                                                                | Laboratory stock      |
| pDG364-P <sub>hyperspank</sub> -mNeptune | amyE integrating plasmid (Cm <sup>R</sup> ) carrying constitutively expressed red fluorescent protein mNeptune                                             | This study            |
| pDG1730                                  | amyE integrating plasmid (Spc <sup>R</sup> )                                                                                                               |                       |
| pDG1730-P <sub>rsbV</sub> -mNeonGreen    | amyE integrating plasmid (Spc <sup>R</sup> ) carrying P <sub>rsbV</sub> ( $\sigma^B$ ) transcriptional reporter                                            | This study            |
| pminiMAD                                 | Suicide plasmid for <i>B. subtilis</i> markerless allelic replacement                                                                                      | Gift of Daniel Kearns |
| pminiMAD- $\Delta$ rsbRA                 | pminiMAD-based markerless deletion plasmid for <i>rsbRA</i>                                                                                                | This study            |
| pminiMAD- $\Delta$ rsbRB                 | pminiMAD-based markerless deletion plasmid for <i>rsbRB</i>                                                                                                | This study            |
| pminiMAD- $\Delta$ rsbRC                 | pminiMAD-based markerless deletion plasmid for <i>rsbRC</i>                                                                                                | This study            |
| pminiMAD- $\Delta$ rsbRD                 | pminiMAD-based markerless deletion plasmid for <i>rsbRD</i>                                                                                                | This study            |
| pminiMAD                                 | pminiMAD-based markerless deletion plasmid for <i>rsbP</i>                                                                                                 | This study            |

|                        |                                                            |                                            |
|------------------------|------------------------------------------------------------|--------------------------------------------|
| D-ΔrsbP                |                                                            |                                            |
| pminiMA<br>D-ΔrsbU     | pminiMAD-based markerless deletion plasmid for <i>rsbU</i> | This study                                 |
| pminiMA<br>D-ΔytvA     | pminiMAD-based markerless deletion plasmid for <i>ytvA</i> | This study                                 |
|                        |                                                            |                                            |
| <b>Primer<br/>name</b> | <b>Sequence (5'-3')</b>                                    |                                            |
| JRR162                 | GATCCTAGAAGCTTATCGAACTCGAGGGTAAATGTGAGCAC<br>TC            | Russell et<br>al., 2017<br>(submitted<br>) |
| JRR163                 | TCCTCGCCTTTACTTACCATGCTCATTCTCCTAATTGTTATC<br>CGC          | Russell et<br>al., 2017<br>(submitted<br>) |
| JRR164                 | AACAATTAGGAGGAATGAGCATGGTAAGTAAAGGCGAGGA<br>GC             | Russell et<br>al., 2017<br>(submitted<br>) |
| JRR165                 | TAAGCTGTCAAACATGAGAATTACTTGTAAGTTCGTCCAT<br>TCCATTC        | Russell et<br>al., 2017<br>(submitted<br>) |
| JRR189                 | ATTCGCCAGGGCTGCAGGAATTACTTATAGAGTTCATCCAT<br>ACCCATC       | Russell et<br>al., 2017<br>(submitted<br>) |
| 689                    | AACAGCTATGACCATGATTACGCCAAGCTTCGGCTATATGG<br>AAATGGCG      | This study                                 |
| 690                    | ATGTCTCAAATGCAAATTCGCTTACCTCCC                             | This study                                 |
| 691                    | GTAAGCGAATTTGCATTTTGAGACATCCGAAAATCC                       | This study                                 |
| 692                    | CGTTGTAACGACGGCCAGTGAATTCTTCCTCTGTCTGCG<br>ACCTG           | This study                                 |

|     |                                                       |            |
|-----|-------------------------------------------------------|------------|
| 693 | AACAGCTATGACCATGATTACGCCAAGCTTTCGCCGCCAAG<br>AACCTTC  | This study |
| 694 | AATCCCCAGCGACACTGCTCCTTTCCCC                          | This study |
| 695 | GGAGCAGTGTCGCTGGGGATTGACTTTTCGA                       | This study |
| 696 | CGTTGTAAAACGACGGCCAGTGAATTCTGTCGGCATCTCTC<br>TCGGG    | This study |
| 697 | AACAGCTATGACCATGATTACGCCAAGCTTGGCAGCCATGA<br>ATTTTGCG | This study |
| 698 | CAAGGAAATACCGATTGATCACCTCTTTTAAATGTG                  | This study |
| 699 | GGTGATCAATCGGTATTTTCCTTGAGATCCACTC                    | This study |
| 700 | CGTTGTAAAACGACGGCCAGTGAATTCCAAGAGCTCATCAA<br>CGCTTGC  | This study |
| 701 | AACAGCTATGACCATGATTACGCCAAGCTTATATCCAAGCT<br>GCACGTC  | This study |
| 702 | GGCAAAGGCATCTCTTAATGAGTTACCTCCTG                      | This study |
| 703 | AACTCATTAAGAGATGCCTTTGCCATGTTTATC                     | This study |
| 704 | CGTTGTAAAACGACGGCCAGTGAATTCGTGCTGTTTTCCAT<br>GCTGAC   | This study |
| 705 | AACAGCTATGACCATGATTACGCCAAGCTTGCCGTCATGCC<br>GATAAACC | This study |
| 706 | GAGCGGGATCATAAATCCCCCTTAGGCCG                         | This study |
| 707 | GGGGATTTATGATCCCGCTCACCCAGC                           | This study |
| 708 | CGTTGTAAAACGACGGCCAGTGAATTCTCCGATGTTTCTCG<br>CTGCG    | This study |
| 727 | GATCCTAGAAGCTTATCGAAAACAATTCGATCAGCATCTGG<br>AAAAG    | This study |
| 728 | TCCTCTCCTTTCGAAACCATCAAATTTTCCTTCAAATCACTA<br>GTTGC   | This study |
| 729 | GTGATTTGAAGGAAAATTTGATGGTTTCGAAAGGAGAGGAG             | This study |

|     |                                                          |            |
|-----|----------------------------------------------------------|------------|
|     | G                                                        |            |
| 752 | CCGCAAAACAGTTCTTACCTCCTACCGAAGCC                         | This study |
| 753 | AACAGCTATGACCATGATTACGCCAAGCTTGTTAATGGGGG<br>CTAAAGTCGTC | This study |
| 754 | AGGTAAGAACTGTTTTGCGGAGAAAGGTTTAACG                       | This study |
| 755 | CGTTGTAAAACGACGGCCAGTGAATTCCTTTGTAAGCGTGC<br>TGAACCG     | This study |
| 756 | TTGATGCTGCGTCACCTCTATCCCTTTCGTTCC                        | This study |
| 757 | AACAGCTATGACCATGATTACGCCAAGCTTCGTTACCAGAC<br>ACTTGACGGC  | This study |
| 758 | TAGAGGTGACGCAGCATCAAAGGAAGCTCATC                         | This study |
| 759 | CGTTGTAAAACGACGGCCAGTGAATTCGCTGTTGCCAATAC<br>GTACGGC     | This study |
